# Supplementary material for: Context Matters: Social Psychological Factors That Underlie Academic Performance across Seven Institutions
Source: Atypon-hosted journal article supplement (doi:10.1187/cbe.21-01-0012), 2021-11-12
Supplement: combinedsupmats.pdf [file combinedsupmats.pdf]

# Supplemental Material

CBE—Life Sciences Education

Salehi *et al.*

## Supplementary materials

Context matters: social psychological factors that underlie academic performance across [seven](#) institutions

Salehi, S.<sup>1</sup>, Berk, S.A.<sup>2</sup>, Brunelli, R.<sup>3</sup>, Cotner, S.<sup>4</sup>, Creech, C.<sup>5</sup>, Drake, A.G.<sup>6</sup>, Fagbodun, S.<sup>7</sup>, Hall, C.<sup>8</sup>, Hebert, S.<sup>4</sup>, Hewlett, J.<sup>9</sup>, James, A.C.<sup>10</sup>, Shuster, M.<sup>10</sup>, St. Juliana, J.R.<sup>6</sup>, Stovall, D.B.<sup>11</sup>, Whittington, R.<sup>7</sup>, Zhong, M.<sup>2</sup>, & Ballen, C.J.<sup>2\*</sup>

\*Corresponding author: [mjb0100@auburn.edu](mailto:mjb0100@auburn.edu)

<sup>1</sup>Stanford University, Stanford, CA

<sup>2</sup>Auburn University, Auburn, AL

<sup>3</sup>California State University, Chico, Chico, CA

<sup>4</sup>University of Minnesota, Minneapolis, MN

<sup>5</sup>Mt. Hood Community College, Gresham, OR

<sup>6</sup>Cornell University, Ithaca, NY

<sup>7</sup>Tuskegee University, Tuskegee, AL

<sup>8</sup>University of New Hampshire, Durham, NH

<sup>9</sup>Finger Lakes Community College, Canandaigua, New York

<sup>10</sup>New Mexico State University, Las Cruces, NM

<sup>11</sup>Winthrop University, Rock Hill, SC

## Supplemental materials include:

Table S1. Survey items with descriptive statistics

**Table S1.** Items used in a survey of undergraduate biology students across multiple institutions. Students responded to survey items on a 7-point Likert scale. Here we include the survey item, as well as descriptive statistics of each individual item along the 7-point scale. In the structural equation model (SEM), we normalized the two social-psychological constructs across our whole sample. For more explanation about this choice see Salehi *et al.* (2020).

| <b>Test Anxiety Construct (Pintrich et al., 1993)</b>                                                                                                                                                                                                                                                                                                                                                                                                         | <b>Mean (M) and Standard deviation (SD)</b>                                                                                                                                  |
|---------------------------------------------------------------------------------------------------------------------------------------------------------------------------------------------------------------------------------------------------------------------------------------------------------------------------------------------------------------------------------------------------------------------------------------------------------------|------------------------------------------------------------------------------------------------------------------------------------------------------------------------------|
| <p>TA1. I have an uneasy, upset feeling when I take a test.</p> <p>TA2. I am so nervous during a test that I cannot remember facts that I have learned.</p> <p>TA3. I worry a great deal about tests.</p> <p>TA4. When I take a test, I think about how poorly I am doing.</p>                                                                                                                                                                                | <p><b>TA1</b></p> <p><math>M_{cc} = 3.94, SD_{cc} = 2.07</math></p> <p><math>M_{Inc} = 4.14, SD_{Inc} = 2.00</math></p> <p><math>M_{Sel} = 4.23, SD_{Sel} = 1.78</math></p>  |
|                                                                                                                                                                                                                                                                                                                                                                                                                                                               | <p><b>TA2</b></p> <p><math>M_{cc} = 3.77, SD_{cc} = 2.03</math></p> <p><math>M_{Inc} = 3.89, SD_{Inc} = 2.00</math></p> <p><math>M_{Sel} = 3.87, SD_{Sel} = 1.80</math></p>  |
|                                                                                                                                                                                                                                                                                                                                                                                                                                                               | <p><b>TA3</b></p> <p><math>M_{cc} = 4.81, SD_{cc} = 2.07</math></p> <p><math>M_{Inc} = 4.94, SD_{Inc} = 1.96</math></p> <p><math>M_{Sel} = 4.75, SD_{Sel} = 1.76</math></p>  |
|                                                                                                                                                                                                                                                                                                                                                                                                                                                               | <p><b>TA4</b></p> <p><math>M_{cc} = 3.79, SD_{cc} = 1.99</math></p> <p><math>M_{Inc} = 3.91, SD_{Inc} = 1.96</math></p> <p><math>M_{Sel} = 4.04, SD_{Sel} = 1.76</math></p>  |
| <p><b>Ethnicity Stigma Consciousness Construct (Picho &amp; Brown, 2011)</b></p> <p>ESC1. My ethnicity affects how I interact with people of other ethnicities</p> <p>ESC2. My ethnicity influences how teachers interact with me</p> <p>ESC3. People from other ethnic groups interpret my behavior based on my ethnicity</p> <p>ESC4. My ethnicity affects how my peers interact with me</p> <p>ESC5. Most people judge me on the basis of my ethnicity</p> | <p><b>ESC1</b></p> <p><math>M_{cc} = 2.96, SD_{cc} = 1.95</math></p> <p><math>M_{Inc} = 3.41, SD_{Inc} = 1.97</math></p> <p><math>M_{Sel} = 3.16, SD_{Sel} = 1.30</math></p> |
|                                                                                                                                                                                                                                                                                                                                                                                                                                                               | <p><b>ESC2</b></p> <p><math>M_{cc} = 2.44, SD_{cc} = 1.59</math></p> <p><math>M_{Inc} = 3.30, SD_{Inc} = 1.81</math></p> <p><math>M_{Sel} = 2.78, SD_{Sel} = 1.19</math></p> |
|                                                                                                                                                                                                                                                                                                                                                                                                                                                               | <p><b>ESC3</b></p> <p><math>M_{cc} = 3.16, SD_{cc} = 1.72</math></p> <p><math>M_{Inc} = 3.80, SD_{Inc} = 1.69</math></p> <p><math>M_{Sel} = 2.01, SD_{Sel} = 1.16</math></p> |
|                                                                                                                                                                                                                                                                                                                                                                                                                                                               | <p><b>ESC4</b></p> <p><math>M_{cc} = 2.85, SD_{cc} = 1.63</math></p> <p><math>M_{Inc} = 3.56, SD_{Inc} = 1.69</math></p> <p><math>M_{Sel} = 3.00, SD_{Sel} = 1.18</math></p> |
|                                                                                                                                                                                                                                                                                                                                                                                                                                                               | <p><b>ESC5</b></p> <p><math>M_{cc} = 2.75, SD_{cc} = 1.59</math></p> <p><math>M_{Inc} = 3.47, SD_{Inc} = 1.61</math></p> <p><math>M_{Sel} = 2.81, SD_{Sel} = 1.15</math></p> |

## References

Picho, K., & Brown, S. W. (2011). Can stereotype threat be measured? A validation of the social identities and attitudes scale (SIAS). *Journal of Advanced Academics*, 22(3), 374–411.

Pintrich, P. R., Smith, D. A. F., Garcia, T., & McKeachie, W. J. (1993). Reliability and predictive validity of the motivated strategies for learning questionnaire (MSLQ). *Education and Psychological Measurement*, 53(3), 801–813.

Salehi, S., Cotner, S., & Ballen, C. (2020). Variation in incoming academic preparation: Consequences for minority and first-generation students. *Frontiers in Education* (5), 552364.
